# Supplementary material for: Enhanced charge collection and surface activity of a CuBi2O4 photocathode via crystal facet engineering
Source: Royal Society of Chemistry journal article supplement (doi:10.1039/d2ta00476c), 2022-01-01
Supplement: d2ta00476c1.pdf [file d2ta00476c1.pdf]

## Supplementary Information

### **Enhanced charge collection and surface activity of $\text{CuBi}_2\text{O}_4$ photocathode via crystal facet engineering**

Bing Tan, Bo Liu, Mengdi Sun, Yingtao Li\*, Zhen Cao\* and Zemin Zhang\*

School of Physical Science and Technology, Lanzhou University,

Lanzhou 730000, China

E-mail: ytli@lzu.edu.cn, caozhen@lzu.edu.cn, zhangzemin@lzu.edu.cn

## Figures

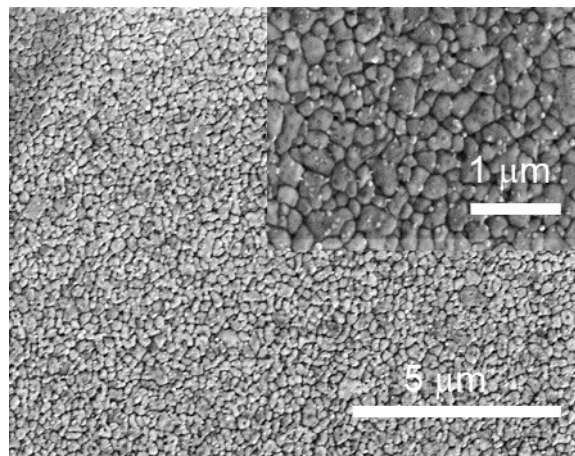

Figure S1. SEM image of grained CBO (g-CBO) film.

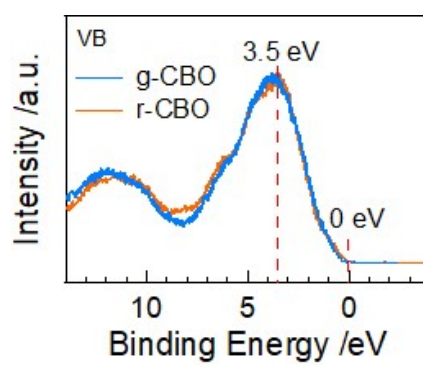

Figure S2. High-resolution XPS spectra of valence band for CBO films.

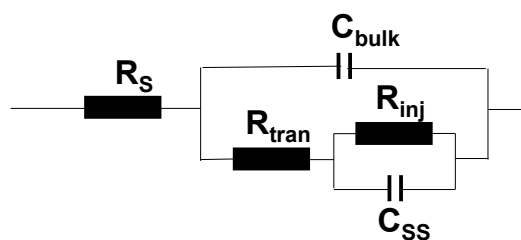

Figure S3. Representative two-RC-unit equivalent fitting models. A typical two-RC-unit equivalent circuit generally consists of three resistances and two capacitors: a series resistance ( $R_s$ , essentially small and constant) by the electrolyte, external contact and conductive substrate layer, a transport resistance ( $R_{\text{tran}}$ ) at surface states by the trapping holes, an injection resistance ( $R_{\text{inj}}$ ) at semiconductor–liquid junction, a bulk capacitor of space charge region ( $C_{\text{bulk}}$ ), and a surface states capacitor ( $C_{\text{ss}}$ ).

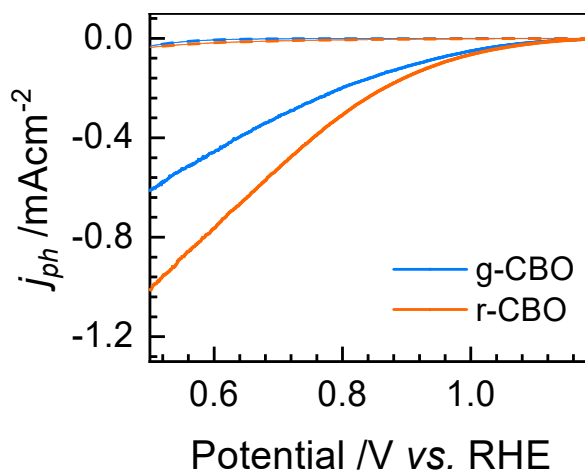

Figure S4. The J-V curves of r-CBO and g-CBO under Xe lamp illumination in 0.1 M  $\text{KHCO}_3$  with 0.1 M  $\text{Na}_2\text{S}_2\text{O}_8$  (pH 8.4) as the electron scavenger.

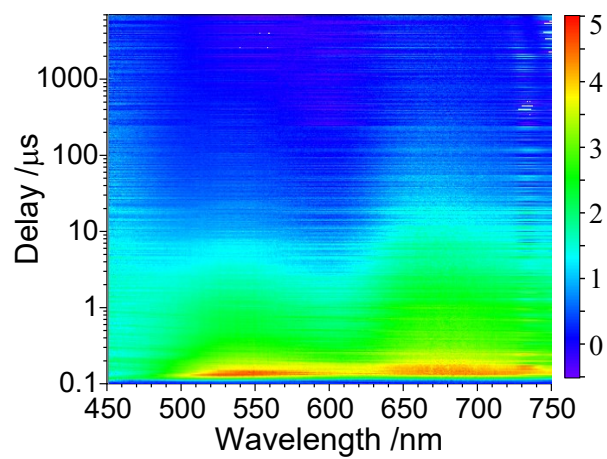

Figure S5. Contour maps of transient absorption spectra in the range of -100 fs to 7.4 ns for g-CBO
